# Supplementary material for: A polymorphic helix of a Salmonella needle protein relays signals defining distinct steps in type III secretion
Source: PubMed Central journal article supplement (PMC6625726; doi:10.1371/journal.pbio.3000351), 2019-07-01
Supplement: pbio.3000351.s045.pdf [file pbio.3000351.s045.pdf]

**Table S1. Strains**

| <b>Strain</b> | <b>Genotype</b>                                        | <b>Source/Reference</b> |
|---------------|--------------------------------------------------------|-------------------------|
| SB3372        | <i>flhD::Tn10 sopBM45 sipD3×F sptP3×F ΔprgI ΔprgJ</i>  | This study.             |
| SB3373        | <i>sopBM45 sipD3×F sptP3×F ΔprgI ΔprgJ</i>             | This study.             |
| SB3374        | <i>flhD::Tn10 sopBM45 sipD3×F ΔprgI ΔprgJ</i>          | This study.             |
| SB3411        | <i>flhD::Tn10 Δgifsy1 Δgifsy2 ΔprgI ΔprgJ</i>          | This study.             |
| SB3485        | <i>flhD::Tn10 sopBM45 ΔsipD</i>                        | This study.             |
| SB3494        | <i>flhD::Tn10 mbp-prgH Δgifsy1 Δgifsy2 ΔprgI ΔprgJ</i> | This study.             |
