# Supplementary material for: A polymorphic helix of a Salmonella needle protein relays signals defining distinct steps in type III secretion
Source: PubMed Central journal article supplement (PMC6625726; doi:10.1371/journal.pbio.3000351), 2019-07-01
Supplement: pbio.3000351.s046.pdf [file pbio.3000351.s046.pdf]

**Table S2. Plasmids**

| <b>Plasmid Designation</b> | <b>Description</b>                                                                                      | <b>Source/Reference</b>            |
|----------------------------|---------------------------------------------------------------------------------------------------------|------------------------------------|
| pSB890                     | R6K suicide plasmid                                                                                     | Constructed by K. Kaniga           |
| pSB3504                    | Plasmid to express <i>hilA</i> in a rhamnose-inducible manner                                           | Wagner et al., and Carleton et al. |
| pSB3910                    | pET15b:: <i>prgI</i> expression vector                                                                  | Constructed by J. Kato             |
| pSB4053                    | Suicide plasmid to insert 3×Flag tag at the C-terminus of <i>sptP</i>                                   | Button and Galan                   |
| pSB4578                    | pWSK129:: <i>sipD3</i> × <i>F</i> complementation vector for SB3485                                     | Rathinavelan et al.                |
| pSB4579                    | pWSK129:: <i>sipD3</i> × <i>F</i> triple mutant (D320R, V323K, S327R) complementation vector for SB3485 | Rathinavelan et al.                |
| pSB4886                    | R6K suicide plasmid to delete <i>sipD</i> and generate SB3485                                           | Constructed by M. Lara-Tejero      |
| pSB5806                    | pET15b:: <i>prgI</i> (V65A) expression vector                                                           | This Study                         |
| pSB5809                    | pET15b:: <i>prgI</i> (T3A) expression vector                                                            | This Study                         |
| pSB5810                    | pET15b:: <i>prgI</i> (L9A) expression vector                                                            | This Study                         |
| pSB5811                    | pET15b:: <i>prgI</i> (F16A) expression vector                                                           | This Study                         |
| pSB5812                    | pET15b:: <i>prgI</i> (L31A) expression vector                                                           | This Study                         |
| pSB5813                    | pET15b:: <i>prgI</i> (L56A) expression vector                                                           | This Study                         |
| pSB5814                    | pET15b:: <i>prgI</i> (E53A) expression vector                                                           | This Study                         |
| pSB5815                    | pET15b:: <i>prgI</i> (D70K) expression vector                                                           | This Study                         |
| pSB5816                    | pET15b:: <i>prgI</i> (K66E) expression vector                                                           | This Study                         |
| pSB5817                    | pET15b:: <i>prgI</i> (K66A/R80A) expression vector                                                      | This Study                         |
| pSB5818                    | R6K suicide plasmid to insert a MBP tag at the N-terminus of <i>prgH</i> to generate SB3494             | This Study                         |
| pSB5819                    | R6K suicide plasmid to delete <i>prgI prgJ</i>                                                          | This Study                         |
| pSB5721                    | pWSK29:: <i>prgI prgJ</i> (WT) used to complement SB3372                                                | This Study                         |
| pSB5722                    | pWSK29:: <i>prgI prgJ</i> (S49A)                                                                        | This Study                         |
| pSB5723                    | pWSK29:: <i>prgI prgJ</i> (N55A)                                                                        | This Study                         |
| pSB5724                    | pWSK29:: <i>prgI prgJ</i> (R58A)                                                                        | This Study                         |
| pSB5725                    | pWSK29:: <i>prgI prgJ</i> (D70A/D72A)                                                                   | This Study                         |
| pSB5726                    | pWSK29:: <i>prgI prgJ</i> (Q77A)                                                                        | This Study                         |
| pSB5727                    | pWSK29:: <i>prgI prgJ</i> (Q77R)                                                                        | This Study                         |
| pSB5728                    | pWSK29:: <i>prgI prgJ</i> (Q77K)                                                                        | This Study                         |
| pSB5729                    | pWSK29:: <i>prgI prgJ</i> (Q77E)                                                                        | This Study                         |
| pSB5730                    | pWSK29:: <i>prgI prgJ</i> (Q77M)                                                                        | This Study                         |
| pSB5731                    | pWSK29:: <i>prgI prgJ</i> (P41A)                                                                        | This Study                         |
| pSB5732                    | pWSK29:: <i>prgI prgJ</i> (Q48A)                                                                        | This Study                         |
| pSB5733                    | pWSK29:: <i>prgI prgJ</i> (D70A)                                                                        | This Study                         |
| pSB5734                    | pWSK29:: <i>prgI prgJ</i> (R80K)                                                                        | This Study                         |
| pSB5735                    | pWSK29:: <i>prgI prgJ</i> (R80E)                                                                        | This Study                         |
| pSB5736                    | pWSK29:: <i>prgI prgJ</i> (R80M)                                                                        | This Study                         |
| pSB5737                    | pWSK29:: <i>prgI prgJ</i> (K66A/R80A)                                                                   | This Study                         |
| pSB5738                    | pWSK29:: <i>prgI prgJ</i> (K66A)                                                                        | This Study                         |
| pSB5740                    | pWSK29:: <i>prgI prgJ</i> (W5A)                                                                         | This Study                         |
| pSB5741                    | pWSK29:: <i>prgI prgJ</i> (Y8A)                                                                         | This Study                         |
| pSB5742                    | pWSK29:: <i>prgI prgJ</i> (F16A)                                                                        | This Study                         |
| pSB5743                    | pWSK29:: <i>prgI prgJ</i> (Y47A)                                                                        | This Study                         |
| pSB5744                    | pWSK29:: <i>prgI prgJ</i> (Y54A)                                                                        | This Study                         |
| pSB5745                    | pWSK29:: <i>prgI prgJ</i> (Y57A)                                                                        | This Study                         |
| pSB5746                    | pWSK29:: <i>prgI prgJ</i> (D72A)                                                                        | This Study                         |

---

|         |                                  |            |
|---------|----------------------------------|------------|
| pSB5747 | pWSK29:: <i>prgl prgJ</i> (F79A) | This Study |
| pSB5748 | pWSK29:: <i>prgl prgJ</i> (E53A) | This Study |
| pSB5749 | pWSK29:: <i>prgl prgJ</i> (F68A) | This Study |
| pSB5750 | pWSK29:: <i>prgl prgJ</i> (I76A) | This Study |
| pSB5751 | pWSK29:: <i>prgl prgJ</i> (N78A) | This Study |
| pSB5753 | pWSK29:: <i>prgl prgJ</i> (L31A) | This Study |
| pSB5754 | pWSK29:: <i>prgl prgJ</i> (D40A) | This Study |
| pSB5755 | pWSK29:: <i>prgl prgJ</i> (L23A) | This Study |
| pSB5756 | pWSK29:: <i>prgl prgJ</i> (D32A) | This Study |
| pSB5757 |                                  |            |
| pSB5758 | pWSK29:: <i>prgl prgJ</i> (N59A) | This Study |
| pSB5759 | pWSK29:: <i>prgl prgJ</i> (N63A) | This Study |
| pSB5760 | pWSK29:: <i>prgl prgJ</i> (K69A) | This Study |
| pSB5761 | pWSK29:: <i>prgl prgJ</i> (L9A)  | This Study |
| pSB5762 | pWSK29:: <i>prgl prgJ</i> (D10A) | This Study |
| pSB5763 | pWSK29:: <i>prgl prgJ</i> (D11A) | This Study |
| pSB5764 | pWSK29:: <i>prgl prgJ</i> (V12A) | This Study |
| pSB5765 | pWSK29:: <i>prgl prgJ</i> (L34A) | This Study |
| pSB5766 | pWSK29:: <i>prgl prgJ</i> (K50A) | This Study |
| pSB5767 | pWSK29:: <i>prgl prgJ</i> (L51A) | This Study |
| pSB5768 | pWSK29:: <i>prgl prgJ</i> (S52A) | This Study |
| pSB5769 | pWSK29:: <i>prgl prgJ</i> (P4A)  | This Study |
| pSB5770 | pWSK29:: <i>prgl prgJ</i> (S6A)  | This Study |
| pSB5771 | pWSK29:: <i>prgl prgJ</i> (P38A) | This Study |
| pSB5772 | pWSK29:: <i>prgl prgJ</i> (S39A) | This Study |
| pSB5773 | pWSK29:: <i>prgl prgJ</i> (D17A) | This Study |
| pSB5774 | pWSK29:: <i>prgl prgJ</i> (T18A) | This Study |
| pSB5775 | pWSK29:: <i>prgl prgJ</i> (V20A) | This Study |
| pSB5776 | pWSK29:: <i>prgl prgJ</i> (D21A) | This Study |
| pSB5777 | pWSK29:: <i>prgl prgJ</i> (V27A) | This Study |
| pSB5778 | pWSK29:: <i>prgl prgJ</i> (T28A) | This Study |
| pSB5779 | pWSK29:: <i>prgl prgJ</i> (S62A) | This Study |
| pSB5780 | pWSK29:: <i>prgl prgJ</i> (S13A) | This Study |
| pSB5781 | pWSK29:: <i>prgl prgJ</i> (N22A) | This Study |
| pSB5782 | pWSK29:: <i>prgl prgJ</i> (Q24A) | This Study |
| pSB5783 | pWSK29:: <i>prgl prgJ</i> (T25A) | This Study |
| pSB5784 | pWSK29:: <i>prgl prgJ</i> (Q26A) | This Study |
| pSB5785 | pWSK29:: <i>prgl prgJ</i> (G7A)  | This Study |
| pSB5786 | pWSK29:: <i>prgl prgJ</i> (G19A) | This Study |
| pSB5787 | pWSK29:: <i>prgl prgJ</i> (Q61A) | This Study |
| pSB5788 | pWSK29:: <i>prgl prgJ</i> (T64A) | This Study |
| pSB5789 | pWSK29:: <i>prgl prgJ</i> (V65A) | This Study |
| pSB5790 | pWSK29:: <i>prgl prgJ</i> (V67A) | This Study |
| pSB5791 | pWSK29:: <i>prgl prgJ</i> (I75A) | This Study |
| pSB5792 | pWSK29:: <i>prgl prgJ</i> (D70K) | This Study |
| pSB5793 | pWSK29:: <i>prgl prgJ</i> (R80Q) | This Study |
| pSB5794 | pWSK29:: <i>prgl prgJ</i> (T3A)  | This Study |
| pSB5795 | pWSK29:: <i>prgl prgJ</i> (K15A) | This Study |
| pSB5796 | pWSK29:: <i>prgl prgJ</i> (E29A) | This Study |
| pSB5797 | pWSK29:: <i>prgl prgJ</i> (K33A) | This Study |
| pSB5798 | pWSK29:: <i>prgl prgJ</i> (K37A) | This Study |

---

---

|         |                                       |            |
|---------|---------------------------------------|------------|
| pSB5799 | pWSK29:: <i>prgI prgJ</i> (L43A)      | This Study |
| pSB5800 | pWSK29:: <i>prgI prgJ</i> (L44A)      | This Study |
| pSB5801 | pWSK29:: <i>prgI prgJ</i> (Q77R/R80Q) | This Study |
| pSB5802 | pWSK29:: <i>prgI prgJ</i> (K66Q/Q77K) | This Study |
| pSB5803 | pWSK29:: <i>prgI prgJ</i> (D70L)      | This Study |
| pSB5804 | pWSK29:: <i>prgI prgJ</i> (D70N)      | This Study |
| pSB5805 | pWSK29:: <i>prgI prgJ</i> (K66E)      | This Study |
| pSB5820 | pWSK29:: <i>prgI prgJ</i> (K66Q)      | This Study |
| pSB5825 | pWSK29:: <i>prgI prgJ</i> (L56A)      | This Study |

---
